# Supplementary material for: Surface protein modification of living bacteria: a promising antitumor therapeutic strategy
Source: Research Square preprint supplement (doi:10.21203/rs.3.rs-1690497/v1), 2022-06-07
Supplement: Supplementary file 1 [file 0df538474d3910b1e426fbd9.docx]

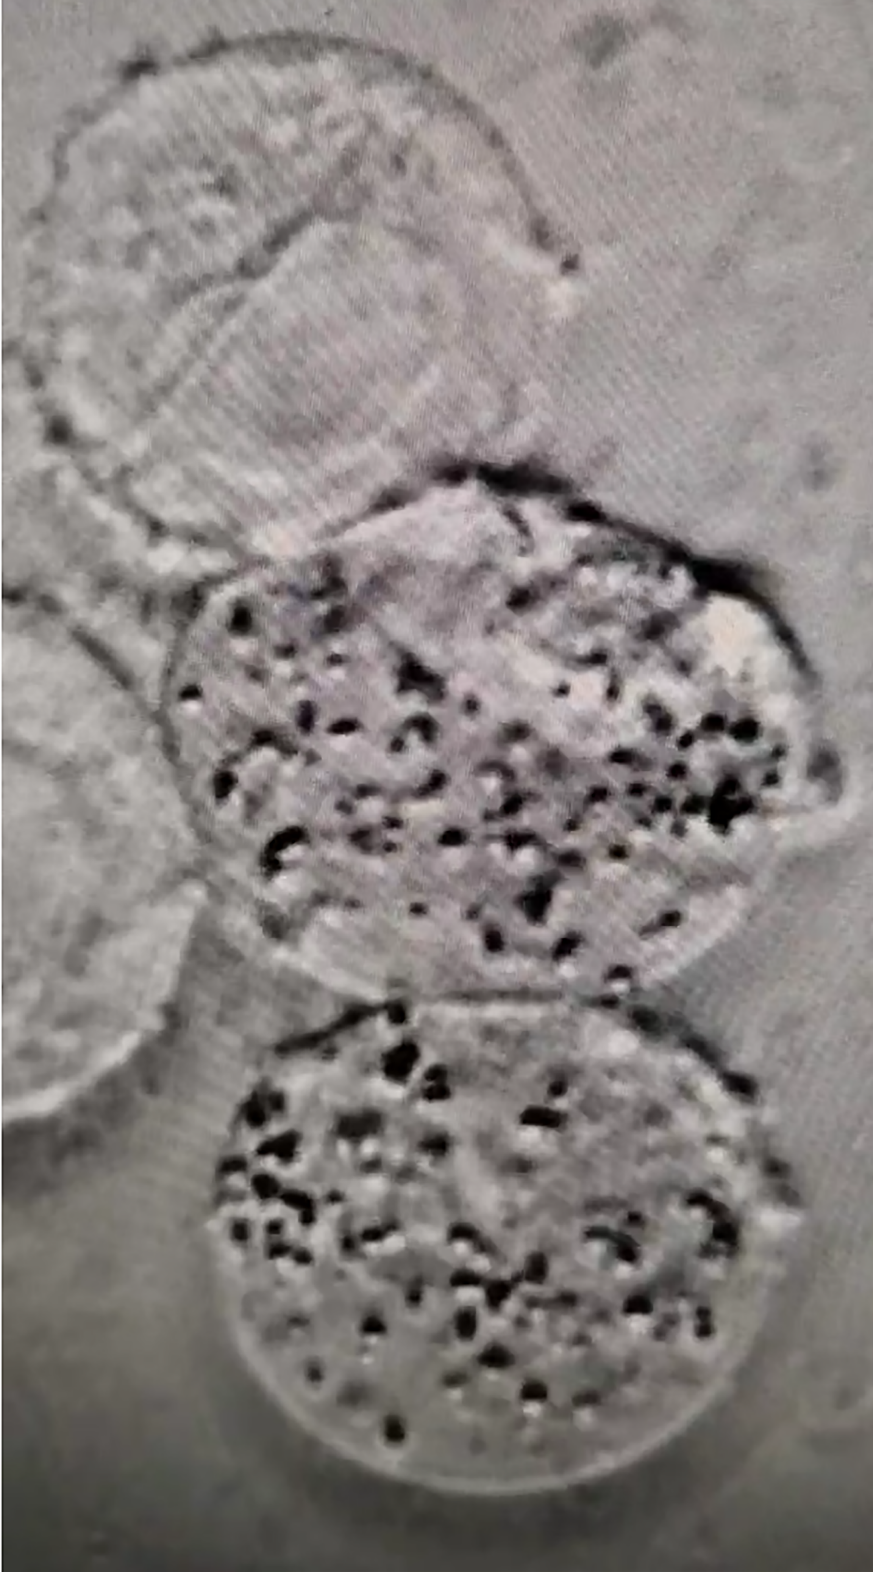


**4**

**3**

**5**

**2**

**1**


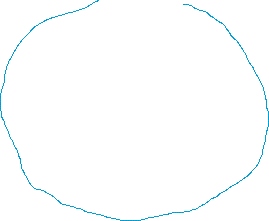

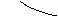

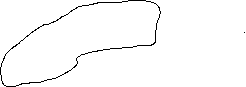

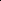

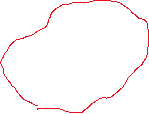

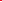

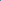

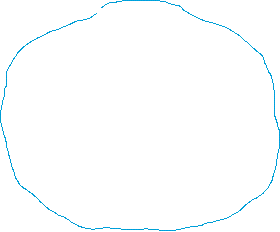

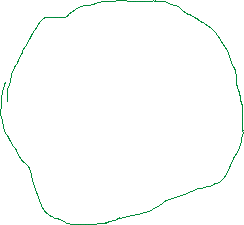


**The legends of supplementary files**

**1.** The E.coli-BSA in the cytoplasm does not fully enter the nucleus.

**2.** A well-defined tumor nucleus

**3.** Partial entry of E.coli-BSA into tumor cells

**4.** Tumor cells with nuclear fragmentation caused by E.coli-BSA

**5.** Surviving E.coli-BSA
